# Supplementary material
Source: Research Square preprint supplement (doi:10.21203/rs.3.rs-10173418/v1)
Supplement: Supplementary file 1 [file f0295e8edd3f0edc87651851.docx]

**Supplementary Materials**

**Table 1.** Formulaiton of the mycelium-oat yogurt alternatives.

|  | OBC-control | SF-control | IF-control |
| --- | --- | --- | --- |
|  | (g/100g) |  |  |
| Oat bran concentrate / Insoluble residue fraction | 6 | / | 6 |
| Soluble fraction | / | 70 | / |
| Mycelium extract | 20 | 20 | 20 |
| Sucrose | 3 | 3 | 3 |
| Oil | 1 | 1 | 1 |
| Milli-Q water | 70 | / | 70 |

OBC-control, whole oat bran concentrate enriched mycelium-based yogurt alternative formulation; SF, soluble oat bran fraction enriched mycelium-based yogurt alternative formulation; IF, insoluble oat bran fraction enriched mycelium-based yogurt alternative formulation.

**Table 2.** Nutritional composition of the mycelium–oat yogurt alternatives.

|  | Ingredient Amount | Carbohydrates | | Fiber | | Protein | | Fat | |
| --- | --- | --- | --- | --- | --- | --- | --- | --- | --- |
| (g/100 g ) | Con. (%) | Amount | Con.(%) | Amount (g/100 g) | Con. (%) | Amount (g/100 g) | Con. (%) | Amount (g/100 g) |
|  | (g/100 g) |
| Mycelium extract | 18.00 | 37.1 | 9.83 | 30.15 | 7.99 | 17.02 | 4.51 | 0.7 | 0.19 |
| Oat bran concentrate | 6.00 | 16 | 0.96 | 37 | 2.22 | 23 | 1.38 | 10 | 0.60 |
| Sucrose | 3.00 | 100 | 3.00 | 0 | 0.00 | 0 | 0.00 | 0 | 0.00 |
| Oil | 1.00 |  |  |  |  |  |  | 5 | 0.05 |
|  |  |  |  |  |  |  |  |  |  |
| Sum |  |  | 13.79 |  | 10.21* |  | 5.89 |  | 0.84 |
| Energy content (kcal/g) |  |  | 4 |  | 2 |  | 4 |  | 9 |
| Energy content (kcal/100g dough) |  |  | 55.17 |  | 20.42 |  | 23.56 |  | 7.52 |
| Energy content (%) |  |  | 51.72 |  | 19.14 |  | 22.09 |  | 7.05 |

*A claim that a food is high in fibre, and any claim likely to have the same meaning for the consumer, may only be made where the product contains at least 6 g of fibre per 100 g or at least 3 g of fibre per 100 kcal. A claim that a food is high in protein, and any claim likely to have the same meaning for the consumer, may only be made where at least 20% of the energy value of the food is provided by protein.

**Table 3**. Three-way ANOVA (significance levels, *p*-values) of sensory texture attributes, showing the effects of sample, panelist, session, and their interactions.

|  | Homogeneity | Spoonability | Viscosity | Graininess | Thickness | Adhesiveness | Cohesiveness |
| --- | --- | --- | --- | --- | --- | --- | --- |
| Panelist | <0.001 | <0.001 | <0.001 | <0.001 | <0.001 | <0.001 | <0.001 |
| Sample | 0.177 | <0.001 | <0.001 | <0.001 | <0.001 | <0.001 | <0.001 |
| Session | 0.081 | 0.022 | <0.001 | 0.879 | 0.002 | 0.087 | 0.346 |
| Panelist * Sample | 0.106 | <0.001 | 0.005 | <0.001 | 0.006 | 0.128 | 0.002 |
| Sample * Session | 0.777 | 0.266 | 0.812 | 0.278 | 0.722 | 0.701 | 0.74 |
| Panelist * Session | 0.012 | <0.001 | <0.001 | <0.001 | <0.001 | <0.001 | <0.001 |

**Table 4**. Texture profiling of mycelium-oat yogurt alternatives, scale intensity 0 = not at all, 10 = very strong.

|  | Homogeneity | Spoonability | Viscosity | Graininess | Thickness | Adhesiveness | Cohesiveness |
| --- | --- | --- | --- | --- | --- | --- | --- |
| OBC-*Lh* | 3.8 ± 1.9 a | 7.7 ± 1.1 cd | 6.4 ± 1.6 b | 6.6 ± 2.0 a | 7.5 ± 1.2 bc | 6.2 ± 1.3 bc | 5.9 ± 1.1 bc |
| OBC-*Lp* | 3.4 ± 1.4 a | 6.5 ± 1.3 b | 5.7 ± 1.4 b | 6.5 ± 1.9 a | 6.7 ± 1.1 b | 5.5 ± 1.0 b | 5.4 ± 1.2 b |
| SF-*Lh* | 4.3 ± 1.6 a | 4.8 ± 1.4 a | 3.7 ± 1.5 a | 5.8 ± 2.0 a | 5.1 ± 1.3 a | 4.5 ± 1.0 a | 3.2 ± 1.0 a |
| SF-*Lp* | 3.9 ± 1.8 a | 4.4 ± 1.0 a | 3.8 ± 1.7 a | 5.7 ± 2.2 a | 5.5 ± 1.3 a | 4.3 ± 1.0 a | 3.6 ± 1.4 a |
| IF-*Lh* | 3.5 ± 2.1 a | 8.5 ± 1.3 d | 6.8 ± 1.5 b | 6.8 ± 2.4 a | 8.0 ± 1.1 c | 6.6 ± 1.0 c | 6.3 ± 1.0 c |
| IF-*Lp* | 3.5 ± 2.1 a | 7.5 ± 1.2 c | 6.4 ± 1.5 b | 6.9 ± 1.8 a | 7.6 ± 1.1 c | 6.2 ± 1.1 bc | 5.9 ± 1.1 bc |

Different superscript letters in the same column for each mycelium extract indicate statistical significance (*p* < 0.05).

**Figure 1.** Oscillation frequency sweep curves of yogurt alternatives on day 7 of storage at 4℃, including elastic modulus (G′), loss modulus (Gʺ), and tangent (tan δ). The lines present are averaged results (n = 3).
